# Supplementary material
Source: PubMed Central journal article supplement (PMC6499683)
Supplement: NIHMS1523838-supplement-2.pdf [file NIHMS1523838-supplement-2.pdf]

**Table S2.** Number of times each proton track was sampled.

| Energy [MeV] | Samples per track |
|--------------|-------------------|--------------|-------------------|--------------|-------------------|--------------|-------------------|--------------|-------------------|--------------|-------------------|
| 0.1          | 46429             | 7.5          | 3102              | 20.5         | 1255              | 36           | 776               | 54           | 513               | 84           | 500               |
| 0.2          | 17686             | 7.75         | 2995              | 21           | 1195              | 36.5         | 692               | 55           | 502               | 85           | 500               |
| 0.3          | 12457             | 8            | 2871              | 21.5         | 1172              | 37           | 689               | 56           | 469               | 86           | 500               |
| 0.5          | 6900              | 8.25         | 2947              | 22           | 1145              | 37.5         | 736               | 57           | 504               | 87           | 500               |
| 0.7          | 6900              | 8.5          | 2745              | 22.5         | 1099              | 38           | 721               | 58           | 528               | 88           | 500               |
| 1            | 6900              | 8.75         | 2854              | 23           | 1150              | 38.5         | 682               | 59           | 386               | 89           | 500               |
| 1.25         | 6900              | 9            | 2532              | 23.5         | 1165              | 39           | 715               | 60           | 500               | 90           | 500               |
| 1.5          | 6900              | 9.25         | 2652              | 24           | 1162              | 39.5         | 611               | 61           | 500               | 91           | 500               |
| 1.75         | 6900              | 9.5          | 2466              | 24.5         | 1033              | 40           | 634               | 62           | 500               | 92           | 500               |
| 2            | 6900              | 9.75         | 2572              | 25           | 1036              | 40.5         | 711               | 63           | 500               | 93           | 500               |
| 2.25         | 5418              | 10           | 2386              | 25.5         | 1065              | 41           | 617               | 64           | 500               | 94           | 500               |
| 2.5          | 5175              | 10.5         | 2282              | 26           | 969               | 41.5         | 641               | 65           | 500               | 95           | 500               |
| 2.75         | 5154              | 11           | 2038              | 26.5         | 930               | 42           | 655               | 66           | 500               | 96           | 500               |
| 3            | 4997              | 11.5         | 2022              | 27           | 1056              | 42.5         | 678               | 67           | 500               | 97           | 500               |
| 3.25         | 5854              | 12           | 2123              | 27.5         | 983               | 43           | 600               | 68           | 500               | 98           | 500               |
| 3.5          | 5805              | 12.5         | 1861              | 28           | 943               | 43.5         | 635               | 69           | 500               | 99           | 500               |
| 3.75         | 5125              | 13           | 1966              | 28.5         | 905               | 44           | 648               | 70           | 500               | 100          | 1042              |
| 4            | 5358              | 13.5         | 1800              | 29           | 884               | 44.5         | 610               | 71           | 500               |              |                   |
| 4.25         | 4951              | 14           | 1886              | 29.5         | 915               | 45           | 596               | 72           | 500               |              |                   |
| 4.5          | 4728              | 14.5         | 1626              | 30           | 845               | 45.5         | 550               | 73           | 500               |              |                   |
| 4.75         | 4512              | 15           | 1609              | 30.5         | 908               | 46           | 620               | 74           | 500               |              |                   |
| 5            | 4189              | 15.5         | 1630              | 31           | 833               | 46.5         | 607               | 74.55        | 386               |              |                   |
| 5.25         | 4081              | 16           | 1592              | 31.5         | 925               | 47           | 613               | 75           | 500               |              |                   |
| 5.5          | 3990              | 16.5         | 1361              | 32           | 822               | 47.5         | 558               | 76           | 500               |              |                   |
| 5.75         | 4230              | 17           | 1558              | 32.5         | 873               | 48           | 549               | 77           | 500               |              |                   |
| 6            | 3611              | 17.5         | 1422              | 33           | 815               | 48.5         | 589               | 78           | 500               |              |                   |
| 6.25         | 3657              | 18           | 1537              | 33.5         | 788               | 49           | 570               | 79           | 500               |              |                   |
| 6.5          | 3705              | 18.5         | 1362              | 34           | 860               | 50           | 582               | 80           | 500               |              |                   |
| 6.75         | 3341              | 19           | 1277              | 34.5         | 772               | 51           | 535               | 81           | 500               |              |                   |
| 7            | 3004              | 19.5         | 1295              | 35           | 736               | 52           | 525               | 82           | 500               |              |                   |
| 7.25         | 2874              | 20           | 1219              | 35.5         | 762               | 53           | 533               | 83           | 500               |              |                   |
